# Supplementary material
Source: HighWire-hosted journal article supplement (https://heart.bmj.com/content/heartjnl-2023-323487)
Supplement: inline-supplementary-material-1 [file inline-supplementary-material-1.pdf]

**SUPPLEMENTAL MATERIAL**

- Table S1: Datasets used for the study, provided by Alberta Health (Government of Alberta Ministry of Health)
- Table S2: Algorithms for the identification of COPD patients
- Table S3: Medications of interest and corresponding ATC codes
- Table S4: ICD-10-CA codes to identify severe CV events
- Table S5: List of time-invariant and time-varying confounders selected a priori
- Table S6: Incidence rate and risk of a first cardiovascular event or all-cause death (composite and individual endpoints) following an exacerbation of any severity
- Table S7: Risk of a first cardiovascular event or all-cause death following a severe, or a moderate exacerbation of COPD; covariate-adjusted Cox model providing HR and 95% confidence intervals
- Table S8: Risk of a first cardiovascular event or all-cause death following a first, or a second, or a third exacerbation of any severity in the incident cohort (N = 52917); covariate-adjusted Cox model providing HR and 95% confidence intervals
- Figure S1: Patient follow-up during exposed and unexposed periods of time

**Table S1. Datasets used for the study, provided by Alberta Health (Government of Alberta Ministry of Health)**

| Database                  | Description                                                                                                                                                     |
|---------------------------|-----------------------------------------------------------------------------------------------------------------------------------------------------------------|
| NACRS                     | Includes data from all emergency department visits and some outpatient-based ambulatory care, including information on services, diagnostic and procedure codes |
| DAD                       | Includes data from inpatient stays, including information on services, diagnostic and procedure intervention codes as well as length of stay                    |
| PIN                       | Includes information on medication dispenses and associated information at the pharmacy level (all private and public plans)                                    |
| Population Registry       | Includes basic demographic information, including age, gender, and zone                                                                                         |
| Practitioner Claims       | Includes provider claims data for physicians and other providers for insured health services, and reports on provider and service data                          |
| Vital statistics – deaths | Includes death information                                                                                                                                      |

Abbreviations: DAD: Discharge Abstract Database; NACRS: National Ambulatory Care Reporting System; PIN: Pharmaceutical Information Network

**Table S2. Algorithms for the identification of COPD patients**

| ICD-9-CM / ICD-10-CA | Code | Code description                                      | Definition algorithm during the cohort year                                                                                                  |
|----------------------|------|-------------------------------------------------------|----------------------------------------------------------------------------------------------------------------------------------------------|
| ICD-9-CM             | 491  | Chronic bronchitis                                    | ≥ 2 outpatient visits (physician claims) in the primary position on separate days and within two years (2 <sup>nd</sup> visit as index date) |
|                      | 492  | Emphysema                                             |                                                                                                                                              |
|                      | 496  | Chronic airways obstruction, not elsewhere classified |                                                                                                                                              |
| ICD-10-CA            | J41  | Chronic bronchitis                                    | 1 inpatient (DAD) admission in any position (discharge date as index date)                                                                   |
|                      | J42  | Unspecified chronic bronchitis                        |                                                                                                                                              |
|                      | J43  | Emphysema                                             |                                                                                                                                              |
|                      | J44  | Other chronic obstructive pulmonary disease           |                                                                                                                                              |

Abbreviations: DAD: Discharge abstract database; ICD-9-CM: International statistical classification of diseases and related health problems, 9th revision, Canadian modification; ICD-10-CA: International statistical classification of diseases and related health problems, 10th revision, Canadian modification.

\* Government of Alberta: Alberta Health, Analytics and Performance Reporting Branch. Interactive Health Data Application: COPD. 2022. [http://www.ahw.gov.ab.ca/IHDA\\_Retrieval/ShowMetaDataNotesServlet?3702](http://www.ahw.gov.ab.ca/IHDA_Retrieval/ShowMetaDataNotesServlet?3702)

**Table S3. Medications of interest and corresponding ATC codes**

| Treatment Class   | ATC code | Medication                                                  | Category                           |
|-------------------|----------|-------------------------------------------------------------|------------------------------------|
| Antibiotics       | J01      | Antibiotics                                                 |                                    |
| SABA              | R03AC02  | salbutamol                                                  | short-acting inhaler               |
|                   | R03AC03  | terbutaline                                                 | short-acting inhaler               |
| SAMA              | R03BB01  | ipratropium                                                 | short-acting inhaler               |
| LAMA              | R03BB04  | tiotropium                                                  | long-acting single inhaler         |
|                   | R03BB05  | aclidinium                                                  | long-acting single inhaler         |
|                   | R03BB06  | glycopyrronium                                              | long-acting single inhaler         |
|                   | R03BB07  | umeclidinium                                                | long-acting single inhaler         |
| LABA              | R03AC12  | salmeterol                                                  | long-acting single inhaler         |
|                   | R03AC13  | formoterol                                                  | long-acting single inhaler         |
|                   | R03AC18  | indacaterol                                                 | long-acting single inhaler         |
|                   | R03AC19  | olodaterol                                                  | long-acting single inhaler         |
| ICS               | R03BA01  | beclometasone                                               | long-acting single inhaler         |
|                   | R03BA02  | budesonide                                                  | long-acting single inhaler         |
|                   | R03BA05  | fluticasone                                                 | long-acting single inhaler         |
|                   | R03BA07  | mometasone                                                  | long-acting single inhaler         |
|                   | R03BA08  | ciclesonide                                                 | long-acting single inhaler         |
|                   | R03BA09  | fluticasone furoate                                         | long-acting single inhaler         |
| OCS               | H02AB06  | prednisolone                                                |                                    |
|                   | H02AB07  | prednisone                                                  |                                    |
| SABA + SAMA       | R03AL02  | salbutamol and ipratropium                                  | short-acting inhaler               |
| LAMA + LABA       | R03AL03  | umeclidinium and vilanterol                                 | long-acting inhaler in combination |
|                   | R03AL04  | glycopyrronium and indacaterol                              | long-acting inhaler in combination |
|                   | R03AL05  | aclidinium and formoterol                                   | long-acting inhaler in combination |
|                   | R03AL06  | tiotropium and olodaterol                                   | long-acting inhaler in combination |
|                   | R03AL    | tiotropium and olodaterol                                   | long-acting inhaler in combination |
| ICS + LABA        | R03AK06  | salmeterol and fluticasone                                  | long-acting inhaler in combination |
|                   | R03AK07  | formoterol and budesonide                                   | long-acting inhaler in combination |
|                   | R03AK09  | formoterol and mometasone                                   | long-acting inhaler in combination |
|                   | R03AK10  | vilanterol and fluticasone                                  | long-acting inhaler in combination |
| ICS + LABA + LAMA | R03AL08  | fluticasone furoate and vilanterol and umeclidinium bromide | long-acting inhaler in combination |

| Treatment Class | ATC code | Medication                                                     | Category                           |
|-----------------|----------|----------------------------------------------------------------|------------------------------------|
|                 | R03AL11  | formoterol and budesonide and glycopyrronium bromide           | long-acting inhaler in combination |
|                 | R03AL12  | indacaterol, glycopyrronium bromide and mometasone             | long-acting inhaler in combination |
| Roflumilast     | R03DX07  | roflumilast                                                    |                                    |
| Theophylline    | R03DA04  | theophylline                                                   |                                    |
| Cardiac drugs   | B01      | antithrombotic agents                                          |                                    |
|                 | C01B     | antiarrhythmics, class I and II                                |                                    |
|                 | C01AA    | digitalis glycosides                                           |                                    |
|                 | C02      | antihypertensives                                              |                                    |
|                 | C03      | diuretics                                                      |                                    |
|                 | C07      | beta-blocking agents                                           |                                    |
|                 | C08      | calcium channel blockers                                       |                                    |
|                 | C09      | agents acting on the renin-angiotensin system                  |                                    |
| Metabolic drugs | C10      | lipid-modifying agents                                         |                                    |
|                 | A10      | antidiabetic agents (insulin and blood glucose-lowering drugs) |                                    |

Abbreviations: ATC: anatomical therapeutic chemical; OCS: oral corticosteroid; ICS: inhaled corticosteroid; LABA: long-acting beta agonist; LAMA: long-acting muscarinic antagonist; SABA: short-acting beta agonist; SAMA: short-acting muscarinic antagonist

**Table S4. ICD-10-CA codes to identify severe CV events**

| Categories of non-fatal severe CV event                                                                     | ICD-10-CA codes                                                                                                                                                                                                                                                                                           |
|-------------------------------------------------------------------------------------------------------------|-----------------------------------------------------------------------------------------------------------------------------------------------------------------------------------------------------------------------------------------------------------------------------------------------------------|
| Acute coronary syndrome <sup>1</sup> : acute myocardial infarction and unstable angina                      | <ul style="list-style-type: none"> <li>• I21 acute myocardial infarction or</li> <li>• I20.0 unstable angina</li> </ul>                                                                                                                                                                                   |
| Heart failure decompensation <sup>2</sup>                                                                   | <ul style="list-style-type: none"> <li>• I50 (congestive) heart failure (only codes in the “most responsible diagnosis”)</li> <li>• J81 acute pulmonary oedema</li> </ul>                                                                                                                                 |
| Cerebral ischemia <sup>3,4</sup> : cerebral infarction and TIA                                              | <ul style="list-style-type: none"> <li>• I63 cerebral infarction or</li> <li>• G45 TIA (“transient cerebral ischemic attacks and related syndromes”)</li> </ul>                                                                                                                                           |
| Arrhythmias <sup>5</sup> : newly diagnosed AF and other serious cardiac arrhythmia including cardiac arrest | <ul style="list-style-type: none"> <li>• I48 atrial fibrillation and flutter (new diagnosis defined as the absence of codes I48 prior to index)</li> <li>• I49 other cardiac arrhythmias (only new diagnosis defined as the absence of codes I49 prior to index)</li> <li>• I46 cardiac arrest</li> </ul> |

Abbreviations: AF: arial fibrillation; CV: cardiovascular; ICD-10-CA: International Statistical Classification of Diseases and Related Health Problems, 10th revision, Canadian modification; TIA: transient ischemic attack

Primary discharge ICD-10-CA codes (namely the “most responsible diagnosis code” i.e., reason for admission and the “post-admission diagnosis code” i.e., complication occurring during the hospital stay) were used to identify hospitalisations for acute coronary syndrome (I21 and I20.0) or ischemic stroke (I63 and G45) because these codes pertained to the diagnosis of acute outcomes.

For heart failure (I50 and J81), only the “most responsible diagnosis” codes were used to approximate the reason of hospitalisation. For arrhythmias (I48, I49 and I46), only new occurrences were considered, to exclude codes and hospitalisations for existing condition

#### References:

<sup>1</sup> Metcalfe A, Neudam A, Forde S, et al. Case definitions for acute myocardial infarction in administrative databases and their impact on in-hospital mortality rates. *Health Serv Res* 2013; **48**(1): 290-318.

<sup>2</sup> Davidson J, Banerjee A, Muzambi R, Smeeth L, Warren-Gash C. Validity of Acute Cardiovascular Outcome Diagnoses Recorded in European Electronic Health Records: A Systematic Review. *Clin Epidemiol* 2020; **12**: 1095-111.

<sup>3</sup> McCormick N, Bhole V, Lacaillle D, Avina-Zubieta JA. Validity of Diagnostic Codes for Acute Stroke in Administrative Databases: A Systematic Review. *PLoS One* 2015; **10**(8): e0135834.

<sup>4</sup> Kokotailo RA, Hill MD. Coding of stroke and stroke risk factors using international classification of diseases, revisions 9 and 10. *Stroke* 2005; **36**(8): 1776-81.

<sup>5</sup> Yao RJR, Andrade JG, Deyell MW, Jackson H, McAlister FA, Hawkins NM. Sensitivity, specificity, positive and negative predictive values of identifying atrial fibrillation using administrative data: a systematic review and meta-analysis. *Clin Epidemiol* 2019; **11**: 753-67.

**Table S5. List of time-invariant and time-varying confounders selected *a priori***

|                                                                                                                                                | <b>Categorisation</b>                                                                                                     | <b>Period of measurement</b>                                                                                                                 |
|------------------------------------------------------------------------------------------------------------------------------------------------|---------------------------------------------------------------------------------------------------------------------------|----------------------------------------------------------------------------------------------------------------------------------------------|
| <b>Patient-related confounders</b>                                                                                                             |                                                                                                                           |                                                                                                                                              |
| Age at cohort entry                                                                                                                            | Continuous                                                                                                                | CED                                                                                                                                          |
| Sex                                                                                                                                            | Male / Female                                                                                                             | CED                                                                                                                                          |
| <b>Comorbidities (ICD-10-CA code)</b>                                                                                                          |                                                                                                                           |                                                                                                                                              |
| Diabetes mellitus type 2 (E11)                                                                                                                 | Yes / No                                                                                                                  | Entire available history                                                                                                                     |
| Disorders of lipoprotein metabolism and other lipidaemias (i.e., including hyperlipidaemia, hypercholesterolemia, dyslipidaemia) E78           | Yes / No                                                                                                                  | Entire available history                                                                                                                     |
| Ischemic heart diseases (I20-I25)                                                                                                              | Yes / No                                                                                                                  | Entire available history                                                                                                                     |
| Hypertensive diseases (I10-I15)                                                                                                                | Yes / No                                                                                                                  | Entire available history                                                                                                                     |
| Heart failure (I50)                                                                                                                            | Yes / No                                                                                                                  | Entire available history                                                                                                                     |
| Cardiomyopathy (I25.5, I42.0, I42.6–I42.9, I43)                                                                                                | Yes / No                                                                                                                  | Entire available history                                                                                                                     |
| Pulmonary oedema (J81)                                                                                                                         | Yes / No                                                                                                                  | Entire available history                                                                                                                     |
| Pulmonary hypertension (I27.0, I27.2)                                                                                                          | Yes / No                                                                                                                  | Entire available history                                                                                                                     |
| Venous thromboembolism (I26, I80, I81, I82, O08.2, O22.3, O87.1, O88.2)                                                                        | Yes / No                                                                                                                  | Entire available history                                                                                                                     |
| Cerebrovascular disease (I60-69)                                                                                                               | Yes / No                                                                                                                  | Entire available history                                                                                                                     |
| Atrial fibrillation (I48) and other arrhythmias (I49)                                                                                          | Yes / No                                                                                                                  | Entire available history                                                                                                                     |
| Current (adult) asthma (J45/J46)                                                                                                               | Yes / No                                                                                                                  | 24-month lookback period                                                                                                                     |
| Chronic kidney disease, renal failure (N17-N19, I12.0, I13.1, I13.2)                                                                           | Yes / No                                                                                                                  | Entire available history                                                                                                                     |
| Severe mental illness including recurrent and persistent depressive disorders (F33, F34), bipolar disorder (F30-31) and schizophrenia (F20-29) | Yes / No                                                                                                                  | Entire available history                                                                                                                     |
| Anxiety disorder (F40-48)                                                                                                                      | Yes / No                                                                                                                  | 24-month lookback period                                                                                                                     |
| <b>Medication (time-varying)</b>                                                                                                               |                                                                                                                           |                                                                                                                                              |
| Any use of cardiac / metabolic agents (see medications table below)                                                                            | At least one dispensation of Cardiac or metabolic agent of each therapeutic subgroup (ATC level 2) in the prior 12 months | Time updated using a rolling 12-month time window. The baseline value was “yes” if a drug was recorded in the 12-month period preceding CED. |
| Long-term inhaled COPD drug use as single therapy (see medications table below):<br>- LABA<br>- LAMA<br>- ICS                                  | Yes (at least one dispensation in the prior 12 months) / No for each category                                             | Time updated using a rolling 12-month time window. The baseline value was “yes” if a drug was recorded in the 12-month period preceding CED. |
| Long-term inhaled COPD drug use as combined therapy (see medications                                                                           | Yes (at least one dispensation in the prior 12 months) / No for each                                                      | Time updated using a rolling 12-month time window. The baseline value was “yes” if a drug was                                                |

|                                               | <b>Categorisation</b>                                                         | <b>Period of measurement</b>                                                                                                                                        |
|-----------------------------------------------|-------------------------------------------------------------------------------|---------------------------------------------------------------------------------------------------------------------------------------------------------------------|
| table below)                                  | category                                                                      | recorded in the 12-month period preceding CED.                                                                                                                      |
| Short-term inhaler:<br>- SABA<br>- SAMA       | Yes (at least one dispensation in the prior 12 months) / No for each category | Time updated using a rolling 12-month time window. The baseline value was “yes” if a drug was recorded in the 12-month period preceding CED.                        |
| Roflumilast and/or theophylline               | Yes (at least one dispensation in the prior 12 months) / No for each category | Time updated using a rolling 12-month time window. The baseline value was “yes” if a drug was recorded in the 12-month period preceding CED.                        |
| <b>Other confounders</b>                      |                                                                               |                                                                                                                                                                     |
| Number of GP visits in the last 12 months     |                                                                               | Time updated using a rolling 12-month time window. The baseline value was the number of GP visits in the 12-month period preceding CED                              |
| Number of exacerbations in the last 12 months | Count variable                                                                | Time updated using a rolling 12-month time window. For prevalent patients, the baseline value was the number of exacerbations in the 12-month period preceding CED. |
| Year at cohort entry                          | YYYY                                                                          | CED                                                                                                                                                                 |
| Incident COPD (vs. prevalent)                 | Yes / No                                                                      | CED                                                                                                                                                                 |
| Season (winter vs. not winter)                | Winter / Not winter                                                           | Time updated at a change in value; baseline value denoted winter or not winter at cohort entry date.<br>Winter was defined as December, January, February & March.  |

Abbreviations: ATC: Anatomical therapeutic chemical; CED: cohort entry date; COPD: chronic obstructive pulmonary disease; CV: cardiovascular; GP: general practitioner physician; ICD-10-CA: International Statistical Classification of Diseases and Related Health problems, 10th revision, Canadian modification; ICS: inhaled corticosteroid; LABA: long-acting beta agonist; LAMA: long-acting muscarinic antagonist; SABA: short-acting beta agonist; SAMA: short-acting muscarinic antagonist



**Table S6. Incidence rate and risk of a first cardiovascular event or all-cause death (composite and individual endpoints) following an exacerbation of any severity**

| Exposure time period                                                   | Crude incidence rate<br>(95% CI) * | Unadjusted            | Fully adjusted †      |
|------------------------------------------------------------------------|------------------------------------|-----------------------|-----------------------|
|                                                                        |                                    | HR (95% CI)           | HR (95% CI)           |
| <b>First severe CV event (any category, including all-cause death)</b> |                                    |                       |                       |
| Prior to the first exacerbation<br>(reference) ‡                       | 5.43 (5.36 - 5.50)                 | 1                     | 1                     |
| 1-7 days                                                               | 95.61 (92.59 - 98.71)              | 17.56 (16.95 - 18.20) | 15.86 (15.17 - 16.58) |
| 8-14 days                                                              | 35.10 (33.14 - 37.15)              | 6.76 (6.38 - 7.17)    | 6.09 (5.71 - 6.50)    |
| 15-30 days                                                             | 23.60 (22.49 - 24.75)              | 4.53 (4.31 - 4.76)    | 4.07 (3.84 - 4.30)    |
| 31-180 days                                                            | 10.91 (10.61 - 11.22)              | 2.08 (2.02 - 2.15)    | 1.85 (1.78 - 1.92)    |
| 181-365 days                                                           | 8.27 (7.97 - 8.58)                 | 1.51 (1.45 - 1.57)    | 1.29 (1.23 - 1.34)    |
| >365 days                                                              | 7.35 (7.16 - 7.55)                 | 1.24 (1.20 - 1.28)    | 1.08 (1.05 - 1.12)    |
| <b>Acute coronary syndrome</b>                                         |                                    |                       |                       |
| Prior to the first exacerbation<br>(reference)                         | 0.80 (0.77 - 0.83)                 | 1                     | 1                     |
| 1-7 days                                                               | 14.11 (12.99 - 15.29)              | 18.79 (17.12 - 20.62) | 24.57 (21.70 - 27.83) |
| 8-14 days                                                              | 2.14 (1.69 - 2.67)                 | 3.08 (2.46 - 3.87)    | 4.10 (3.22 - 5.23)    |
| 15-30 days                                                             | 1.39 (1.13 - 1.68)                 | 1.97 (1.62 - 2.39)    | 2.57 (2.08 - 3.18)    |
| 31-180 days                                                            | 0.79 (0.71 - 0.87)                 | 1.14 (1.03 - 1.27)    | 1.40 (1.24 - 1.60)    |
| 181-365 days                                                           | 0.83 (0.73 - 0.92)                 | 1.21 (1.08 - 1.37)    | 1.39 (1.22 - 1.59)    |
| >365 days                                                              | 0.77 (0.71 - 0.83)                 | 1.17 (1.07 - 1.28)    | 1.12 (1.02 - 1.23)    |
| <b>Heart failure decompensation</b>                                    |                                    |                       |                       |
| Prior to the first exacerbation<br>(reference)                         | 0.56 (0.53 - 0.58)                 | 1                     | 1                     |
| 1-7 days                                                               | 21.45 (20.07 - 22.90)              | 43.06 (39.63 - 46.79) | 72.34 (64.43 - 81.22) |
| 8-14 days                                                              | 2.52 (2.03 - 3.09)                 | 5.53 (4.48 - 6.84)    | 9.55 (7.59 - 12.02)   |
| 15-30 days                                                             | 1.16 (0.93 - 1.43)                 | 2.50 (2.02 - 3.10)    | 4.13 (3.28 - 5.21)    |
| 31-180 days                                                            | 0.68 (0.61 - 0.76)                 | 1.54 (1.37 - 1.73)    | 2.25 (1.96 - 2.59)    |
| 181-365 days                                                           | 0.49 (0.42 - 0.57)                 | 1.14 (0.98 - 1.33)    | 1.44 (1.22 - 1.70)    |
| >365 days                                                              | 0.50 (0.45 - 0.55)                 | 1.14 (1.02 - 1.28)    | 0.96 (0.86 - 1.08)    |
| <b>Cerebral ischemia</b>                                               |                                    |                       |                       |
| Prior to the first exacerbation<br>(reference)                         | 0.51 (0.49 - 0.53)                 | 1                     | 1                     |
| 1-7 days                                                               | 5.14 (4.48 - 5.86)                 | 10.52 (9.12 - 12.13)  | 16.12 (13.39 - 19.41) |
| 8-14 days                                                              | 1.14 (0.82 - 1.55)                 | 2.37 (1.74 - 3.22)    | 3.72 (2.67 - 5.19)    |
| 15-30 days                                                             | 0.74 (0.56 - 0.96)                 | 1.55 (1.19 - 2.02)    | 2.39 (1.79 - 3.20)    |
| 31-180 days                                                            | 0.54 (0.48 - 0.61)                 | 1.12 (0.99 - 1.28)    | 1.58 (1.34 - 1.87)    |
| 181-365 days                                                           | 0.55 (0.48 - 0.63)                 | 1.15 (1.00 - 1.33)    | 1.47 (1.24 - 1.74)    |
| >365 days                                                              | 0.51 (0.46 - 0.57)                 | 1.09 (0.98 - 1.22)    | 1.03 (0.92 - 1.15)    |
| <b>Arrhythmias (new diagnosis)</b>                                     |                                    |                       |                       |
| Prior to the first exacerbation<br>(reference)                         | 0.44 (0.42 - 0.46)                 | 1                     | 1                     |

| Exposure time period                           | Crude incidence rate<br>(95% CI) * | Unadjusted            | Fully adjusted †      |
|------------------------------------------------|------------------------------------|-----------------------|-----------------------|
|                                                |                                    | HR (95% CI)           | HR (95% CI)           |
| 1-7 days                                       | 10.41 (9.46 - 11.43)               | 24.96 (22.34 - 27.88) | 31.18 (26.84 - 36.21) |
| 8-14 days                                      | 1.37 (1.02 - 1.80)                 | 3.50 (2.63 - 4.64)    | 4.43 (3.27 - 5.99)    |
| 15-30 days                                     | 0.76 (0.57 - 0.98)                 | 1.97 (1.52 - 2.56)    | 2.46 (1.85 - 3.25)    |
| 31-180 days                                    | 0.52 (0.45 - 0.58)                 | 1.40 (1.22 - 1.59)    | 1.64 (1.40 - 1.92)    |
| 181-365 days                                   | 0.44 (0.37 - 0.51)                 | 1.19 (1.01 - 1.40)    | 1.30 (1.09 - 1.55)    |
| >365 days                                      | 0.40 (0.35 - 0.44)                 | 1.10 (0.97 - 1.24)    | 0.99 (0.87 - 1.12)    |
| <b>All-cause death</b>                         |                                    |                       |                       |
| Prior to the first exacerbation<br>(reference) | 3.65 (3.59 - 3.71)                 | 1                     | 1                     |
| 1-7 days                                       | 51.01 (48.89 - 53.18)              | 13.72 (13.12 - 14.35) | 10.05 (9.52 - 10.60)  |
| 8-14 days                                      | 31.61 (29.83 - 33.46)              | 8.45 (7.96 - 8.96)    | 6.12 (5.72 - 6.54)    |
| 15-30 days                                     | 22.08 (21.05 - 23.15)              | 5.90 (5.62 - 6.20)    | 4.31 (4.06 - 4.56)    |
| 31-180 days                                    | 9.72 (9.45 - 10.00)                | 2.56 (2.48 - 2.64)    | 1.91 (1.84 - 1.99)    |
| 181-365 days                                   | 6.93 (6.67 - 7.21)                 | 1.71 (1.64 - 1.78)    | 1.26 (1.20 - 1.31)    |
| >365 days                                      | 6.13 (5.96 - 6.31)                 | 1.33 (1.29 - 1.38)    | 1.11 (1.07 - 1.15)    |

Abbreviations: CI: confidence interval; CV: cardiovascular; HR: hazard ratio

\* Crude rate (95% CI) was calculated as the number of first severe CV events or deaths per 100 person-years.

† Fully adjusted Cox model provided HR and 95% Confidence Intervals and included sex, comorbidities, year of cohort entry, residence at cohort entry, neighbourhood income quintile and time varying covariates (cardiac/metabolic agents, COPD medication use, general practitioner visits, number of exacerbations in last 12 months, season and time-varying age).

‡ Reference time was the earliest of: 1) a first exacerbation or 2) end of follow-up due to experiencing the event or right censoring.

**Table S7. Risk of a first cardiovascular event or all-cause death following a severe, or a moderate exacerbation of COPD; covariate-adjusted hazard ratios from fitted Cox model with 95% confidence intervals**

| <b>Exposure time period</b>                   | <b>Unadjusted<br/>HR (95% CI)</b> | <b>Fully adjusted *<br/>HR (95% CI)</b> |
|-----------------------------------------------|-----------------------------------|-----------------------------------------|
| Prior to the first exacerbation (reference) † | 1                                 | 1                                       |
| <b>Moderate exacerbation</b>                  |                                   |                                         |
| 1-7 days                                      | 2.74 (2.42 - 3.09)                | 2.47 (2.17 - 2.80)                      |
| 8-14 days                                     | 2.28 (1.98 - 2.63)                | 2.06 (1.77 - 2.38)                      |
| 15-30 days                                    | 1.85 (1.66 - 2.06)                | 1.71 (1.52 - 1.91)                      |
| 31-180 days                                   | 1.17 (1.11 - 1.23)                | 1.13 (1.06 - 1.20)                      |
| 181-365 days                                  | 0.95 (0.89 - 1.02)                | 0.94 (0.87 - 1.00)                      |
| >365 days                                     | 0.86 (0.82 - 0.90)                | 0.92 (0.87 - 0.96)                      |
| <b>Severe exacerbation</b>                    |                                   |                                         |
| 1-7 days                                      | 30.78 (29.67 - 31.93)             | 24.88 (23.75 - 26.07)                   |
| 8-14 days                                     | 10.81 (10.14 - 11.51)             | 8.66 (8.08 - 9.29)                      |
| 15-30 days                                    | 7.04 (6.66 - 7.44)                | 5.54 (5.21 - 5.89)                      |
| 31-180 days                                   | 2.99 (2.89 - 3.10)                | 2.25 (2.16 - 2.35)                      |
| 181-365 days                                  | 2.08 (1.99 - 2.18)                | 1.47 (1.40 - 1.55)                      |
| >365 days                                     | 1.62 (1.56 - 1.68)                | 1.20 (1.16 - 1.25)                      |

Abbreviations: CI: confidence interval; HR: hazard ratio

\* Fully adjusted model included sex, comorbidities, year of cohort entry, residence at cohort entry, neighbourhood income quintile and time-varying covariates (cardiac/metabolic agents, COPD medication use, general practitioner visits, number of exacerbations in last 12 months, season and time-varying age).

† Reference period was the time prior to the earliest of 1) a first exacerbation or 2) end of follow-up due to experiencing the event or right censoring.

**Table S8. Risk of a first cardiovascular event or all-cause death following a first, or a second, or a third exacerbation of any severity in the incident cohort (N = 52917); covariate-adjusted hazard ratios from fitted Cox model with 95% confidence intervals**

| Exposure time period                          | Unadjusted<br>HR (95% CI) | Fully adjusted *<br>HR (95% CI) |
|-----------------------------------------------|---------------------------|---------------------------------|
| Prior to the first exacerbation (reference) † | 1                         | 1                               |
| <b>First exacerbation</b>                     |                           |                                 |
| 1-7 days                                      | 14.52 (12.69 - 16.61)     | 13.87 (12.07 - 15.94)           |
| 8-14 days                                     | 4.05 (3.18 - 5.16)        | 3.88 (3.03 - 4.95)              |
| 15-30 days                                    | 2.85 (2.36 - 3.44)        | 2.73 (2.25 - 3.31)              |
| 31-180 days                                   | 1.52 (1.38 - 1.66)        | 1.46 (1.32 - 1.61)              |
| 181-365 days                                  | 1.28 (1.16 - 1.41)        | 1.23 (1.11 - 1.36)              |
| >365 days                                     | 1.13 (1.06 - 1.21)        | 1.04 (0.98 - 1.11)              |
| <b>Second exacerbation</b>                    |                           |                                 |
| 1-7 days                                      | 16.69 (14.45 - 19.28)     | 16.07 (13.77 - 18.75)           |
| 8-14 days                                     | 4.84 (3.64 - 6.43)        | 4.69 (3.51 - 6.27)              |
| 15-30 days                                    | 4.14 (3.35 - 5.10)        | 3.99 (3.21 - 4.96)              |
| 31-180 days                                   | 1.75 (1.55 - 1.98)        | 1.65 (1.44 - 1.89)              |
| 181-365 days                                  | 1.35 (1.17 - 1.57)        | 1.24 (1.06 - 1.46)              |
| >365 days                                     | 1.20 (1.06 - 1.36)        | 1.05 (0.93 - 1.20)              |
| <b>Third+ exacerbation</b>                    |                           |                                 |
| 1-7 days                                      | 13.02 (11.44 - 14.82)     | 12.76 (10.77 - 15.13)           |
| 8-14 days                                     | 6.02 (4.92 - 7.37)        | 5.93 (4.71 - 7.48)              |
| 15-30 days                                    | 3.78 (3.16 - 4.52)        | 3.70 (3.00 - 4.56)              |
| 31-180 days                                   | 1.83 (1.64 - 2.05)        | 1.76 (1.53 - 2.03)              |
| 181-365 days                                  | 1.38 (1.17 - 1.63)        | 1.23 (1.03 - 1.47)              |
| >365 days                                     | 1.56 (1.34 - 1.82)        | 1.31 (1.12 - 1.53)              |

Abbreviations: CI: confidence interval; COPD: chronic obstructive pulmonary disease; HR: hazard ratio

\* Fully adjusted model included sex, comorbidities, year of cohort entry, residence at cohort entry, neighbourhood income quintile and time-varying covariates (cardiac/metabolic agents, COPD medication use, general practitioner visits, number of exacerbations in last 12 months, season and time-varying age).

† Reference period was the time prior to the earliest of 1) a first exacerbation or 2) end of follow-up due to experiencing the event or right censoring.

Figure S1. Patient follow-up during exposed, and unexposed periods of time

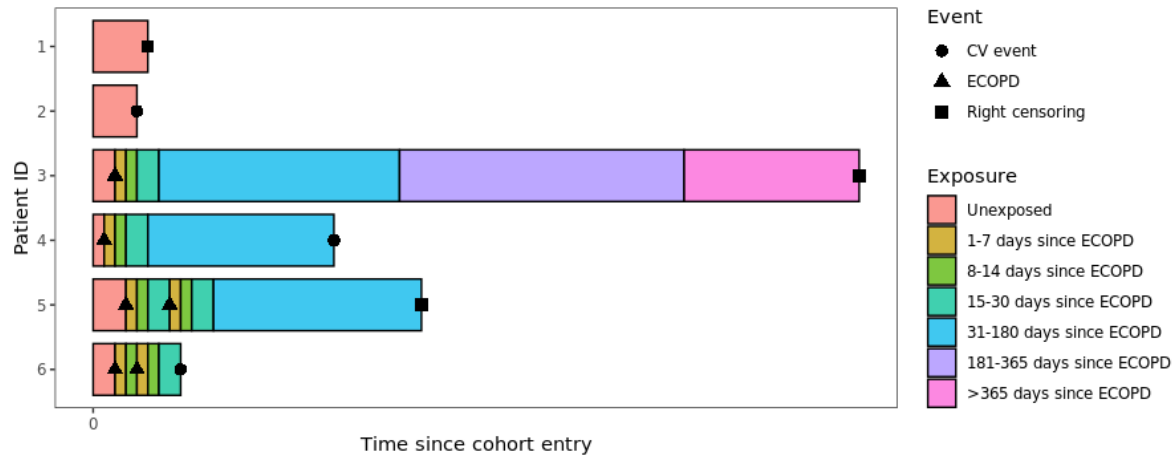

Abbreviations: CV: cardiovascular event or all-cause death; ECOPD: exacerbation from chronic obstructive pulmonary disease; Exposed: evidence of a patient exacerbation from chronic obstructive pulmonary disease; ID: patient identification number; Unexposed: no evidence of patient exacerbation from chronic obstructive pulmonary disease
